# Supplementary material for: Safety of Early Bevacizumab Administration after Central Venous Port Placement for Patients with Colorectal Cancer
Source: MDPI journal article supplement (doi:10.3390/cancers15082264), 2023-04-12
Supplement: s1 [file s1]

**Supplementary Table S1.** Univariate analysis for risk factors of CV port implantation-related complications.

| Factor                           | Category                      | Univariate analysis |             |              |
|----------------------------------|-------------------------------|---------------------|-------------|--------------|
|                                  |                               | Odds ratio          | 95% CI      | <i>P</i>     |
| BEV initiation from implantation | < 7 days                      | 1.00                | Ref         | Ref          |
|                                  | ≤ 7 days                      | 0.912               | 0.386–2.157 | 0.834        |
| Age                              |                               | 1.003               | 0.964–1.044 | 0.865        |
| Sex                              | Female                        | 1.00                | Ref         | Ref          |
|                                  | Male                          | 3.154               | 1.19–8.357  | <b>0.021</b> |
| Insertion vein                   | Right internal jugular        | 1.00                | Ref         | Ref          |
|                                  | Right subclavian              | 2.67                | 0.301–23.69 | 0.378        |
|                                  | Left internal                 | 0.271               | 0.014–5.387 | 0.392        |
| Device type                      | PowerPort® ClearVUE® isp      | 1.00                | Ref         | Ref          |
|                                  | PowerPort® MRI                | 0.944               | 0.252–3.539 | 0.932        |
|                                  | Safe Guide™ Micro Needle Port | 1.235               | 0.264–5.781 | 0.789        |
| Procedure time                   | Procedure time                | 0.966               | 0.948–1.046 | 0.86         |
| Performance status               | 0                             | 1.00                | Ref         | Ref          |
|                                  | 1                             | 1.038               | 0.422–2.553 | 0.936        |
|                                  | 2                             | 0.597               | 0.071–4.992 | 0.634        |
| Hypertension                     | Yes                           | 1.647               | 0.630–4.309 | 0.309        |
| Hyperlipidemia                   | Yes                           | 1.935               | 0.499–7.508 | 0.340        |
| Chronic kidney disease           | Yes                           | 0.325               | 0.016–6.724 | 0.467        |
| Anticoagulant medication         | Yes                           | 1.491               | 0.508–4.376 | 0.467        |
| Diabetes                         | Yes                           | 1.286               | 0.345–4.791 | 0.708        |
| Tumor location                   | Colon                         | 1.00                | Ref         | Ref          |
|                                  | Rectum                        | 0.856               | 0.345–2.121 | 0.737        |

Abbreviations: BEV, bevacizumab; CI, confidence interval.

**Supplementary Table S2.** Baseline patient characteristics in chemotherapy regimen with/without BEV groups.

| Characteristics                       | Chemotherapy regimen<br>with BEV (n = 184) | Chemotherapy regimen<br>without BEV (n = 57) | P    |
|---------------------------------------|--------------------------------------------|----------------------------------------------|------|
| Age, years                            | 67 [32–85]                                 | 69 [23–85]                                   | 0.36 |
| Sex; Female                           | 96 (52)                                    | 20 (35)                                      | 0.09 |
| Male                                  | 88 (48)                                    | 37 (65)                                      |      |
| Eastern Oncology<br>Group Performance |                                            |                                              |      |
| Status score                          | 106 (58)                                   | 28 (49)                                      | 0.41 |
| 0                                     | 66 (36)                                    | 26 (46)                                      |      |
| 1                                     | 12 (6)                                     | 3 (5)                                        |      |
| 2                                     |                                            |                                              |      |
| Tumor site                            |                                            |                                              |      |
| Colon                                 | 117 (64)                                   | 35 (61)                                      | 0.77 |
| Rectum                                | 67 (34)                                    | 22 (39)                                      |      |
| Hypertension                          |                                            |                                              |      |
| Yes                                   | 39 (21)                                    | 18 (32)                                      | 0.11 |
| No                                    | 145 (79)                                   | 39 (68)                                      |      |
| Hyperlipidemia                        |                                            |                                              |      |
| Yes                                   | 14 (8)                                     | 5 (9)                                        | 0.78 |
| No                                    | 170 (93)                                   | 52 (91)                                      |      |
| Chronic kidney<br>disease             |                                            |                                              |      |
| Yes                                   | 9 (5)                                      | 3 (5)                                        | 0.91 |
| No                                    | 175 (95)                                   | 54 (95)                                      |      |
| Diabetes                              |                                            |                                              |      |
| Yes                                   | 19 (10)                                    | 11 (20)                                      | 0.06 |
| No                                    | 165 (90)                                   | 45 (80)                                      |      |
| Anticoagulant<br>medication           |                                            |                                              |      |
| Yes                                   | 29 (16)                                    | 10 (18)                                      | 0.75 |
| No                                    | 155 (84)                                   | 47 (82)                                      |      |
| Body mass index                       | 21.5 [16–42]                               | 22.3 [16.2–30.7]                             | 0.77 |

**Supplementary Figure S1.** Kaplan-Meier curve analysis for event-free survival for chemotherapy regimens with/without BEV.

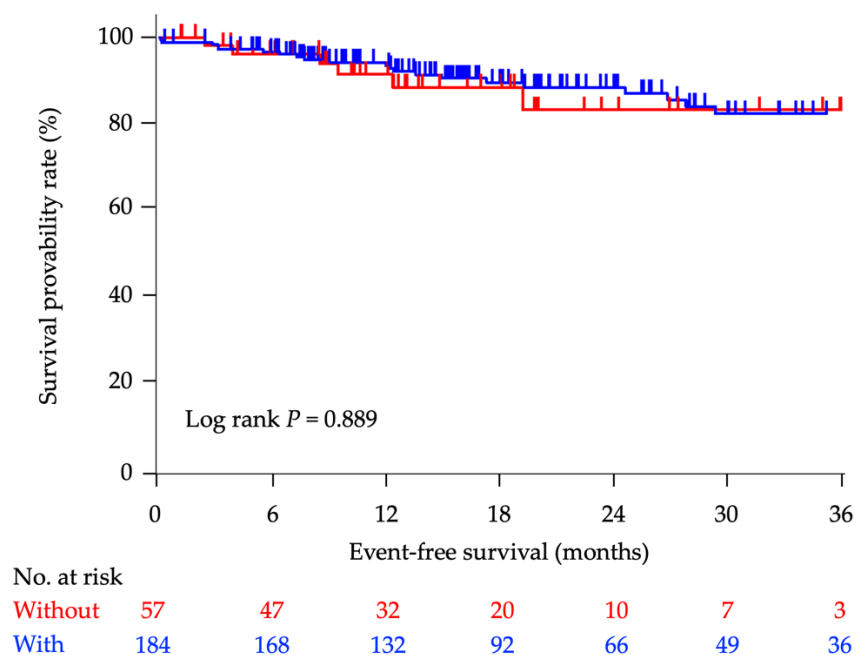

Kaplan-Meier analysis for event-free survival between the chemotherapy with BEV-containing regimen group (with) vs. that without BEV-containing regimen group (without), with no significant difference between the two ( $P = 0.889$ ).

Abbreviations: BEV, bevacizumab.
